# Supplementary material for: Ultrasmall tungsten phosphide nanoparticles embedded in nitrogen-doped carbon as a highly active and stable hydrogen-evolution electrocatalyst
Source: Royal Society of Chemistry journal article supplement (doi:10.1039/c6ta05165k), 2016-01-01
Supplement: c6ta05165k1.pdf [file c6ta05165k1.pdf]

## Electronic Supplementary Information

### Ultrasmall tungsten phosphide nanoparticles embedded in nitrogen-doped carbon as a highly active and stable hydrogen-evolution electrocatalyst

Zonghua Pu,<sup>a</sup> Xue Ya,<sup>b</sup> Ibrahim Saana Amiinu,<sup>a</sup> Zhenkai Tu,<sup>a</sup>\* Xiaobo Liu,<sup>a</sup> Wenqiang Li,<sup>a</sup> and Shichun Mu<sup>a</sup>\*

<sup>a</sup> State Key Laboratory of Advanced Technology for Materials Synthesis and Processing, Wuhan University of Technology, Wuhan 430070, P. R. China

<sup>b</sup> Laboratory of Southwest China Wildlife Resources Conservation, China West Normal University, Nanchong 637009, P. R. China

E-mail: tzklq@whut.edu.cn; msc@whut.edu.cn.

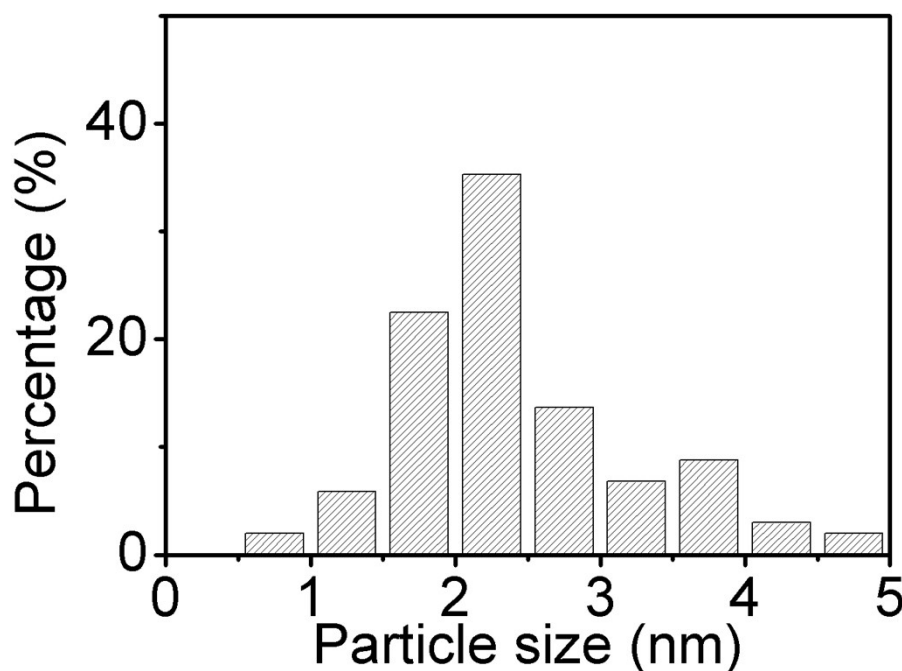

Fig. S1 Size distribution of WP NPs in WP NPs@NC.

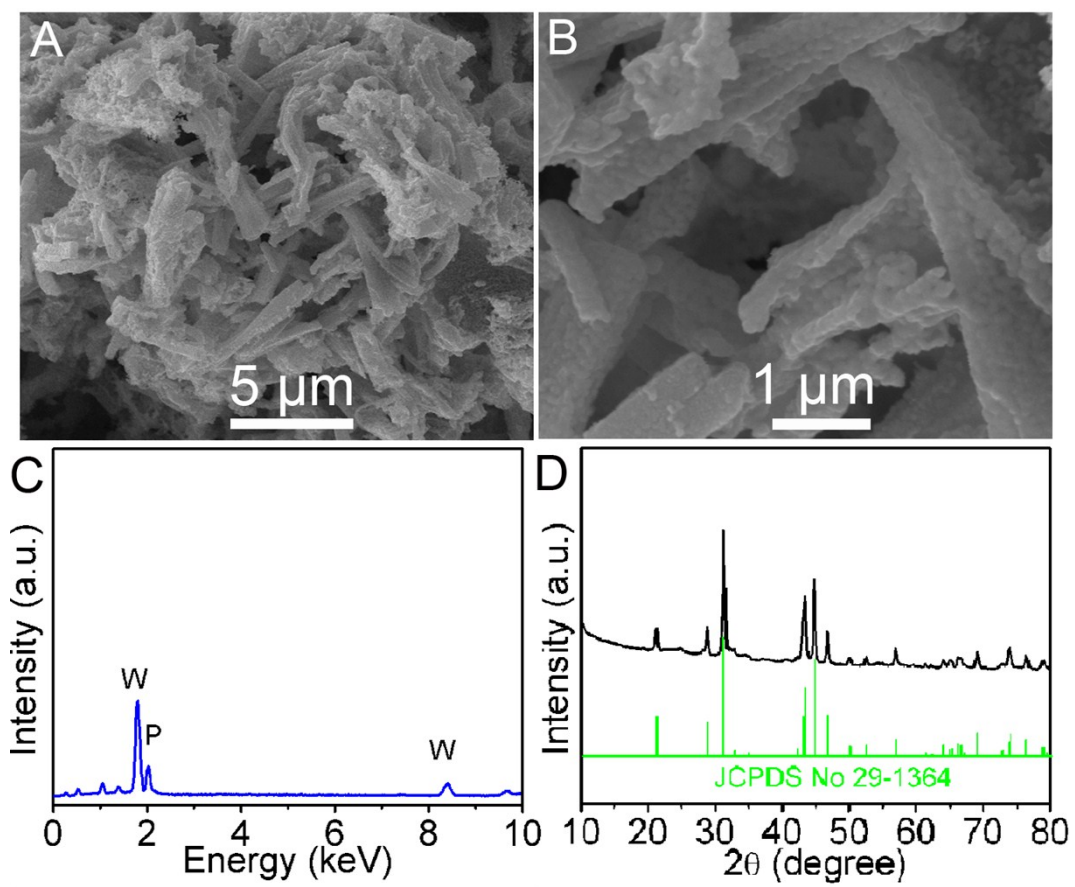

**Fig. S2.** (A) Low- and (B) high-magnification SEM images of bulk WP. (C) EDX spectrum and (D) XRD pattern of bulk WP.

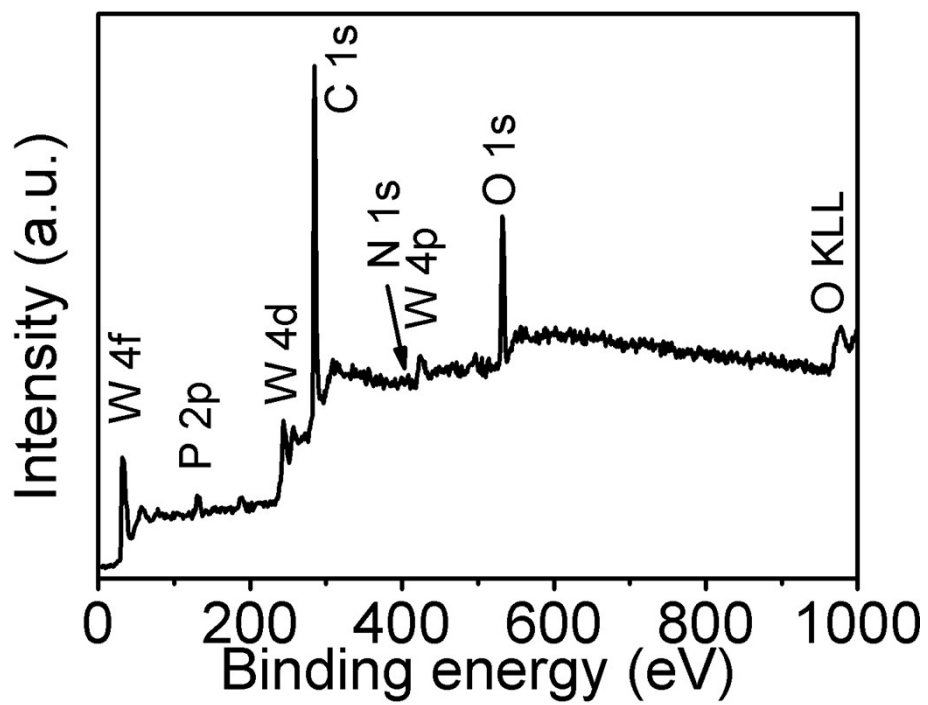

**Fig. S3.** The survey XPS spectra of the WP NPs@NC.

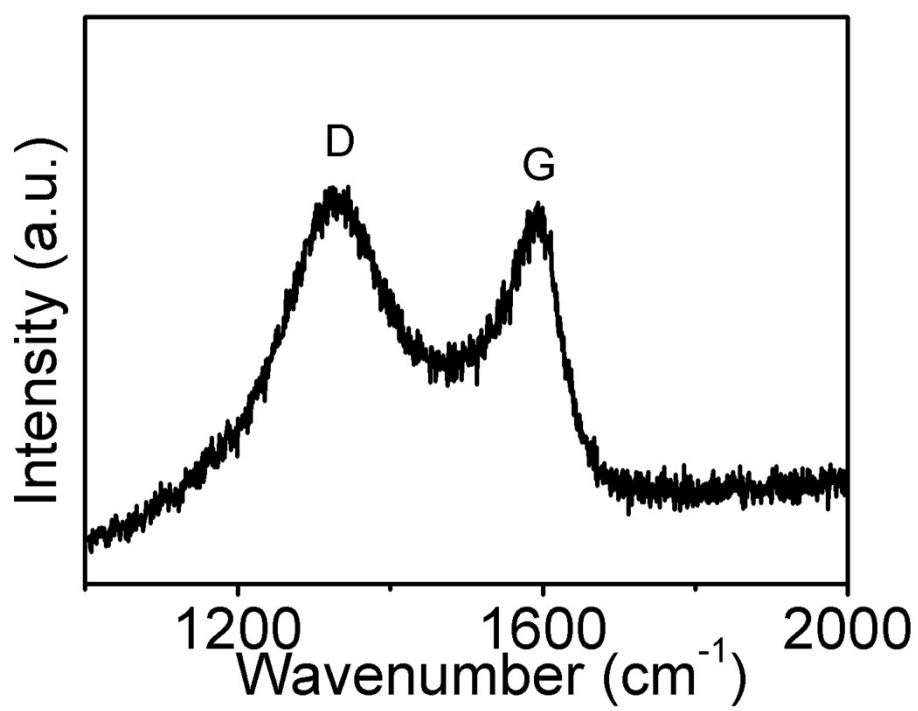

**Fig. S4.** Raman spectrum of the as-prepared WP NPs@NC.

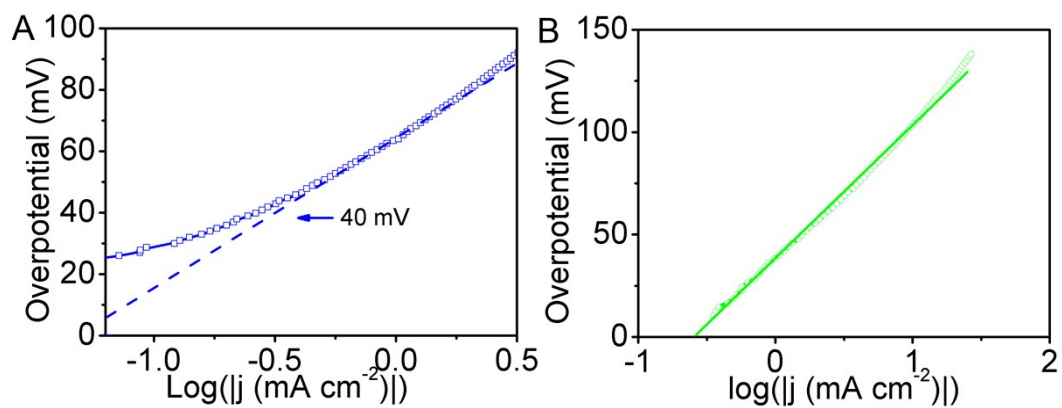

**Fig. S5.** (A) Tafel plot in the region of low current densities of WP NPs@NC in 0.5 M H<sub>2</sub>SO<sub>4</sub>. (B) Calculation of exchange current density of WP NPs@NC by applying extrapolation method to the Tafel plot.

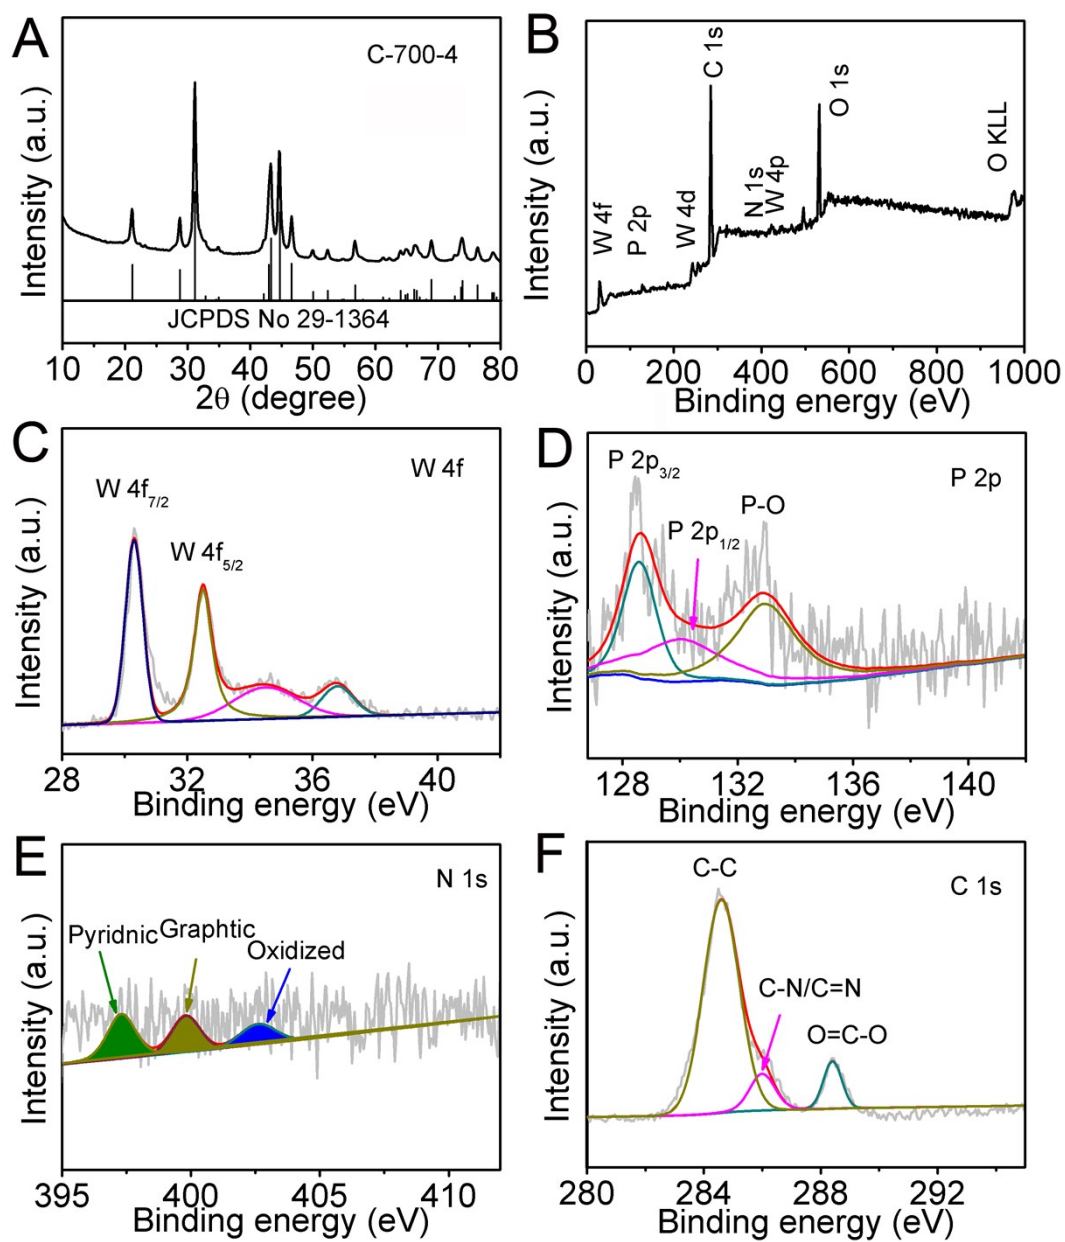

**Fig. S6.** (A) XRD pattern of C-700-4. (B) The survey XPS spectra of the C-700-4. (C-F) The high-resolution XPS spectra of the C-700-4.

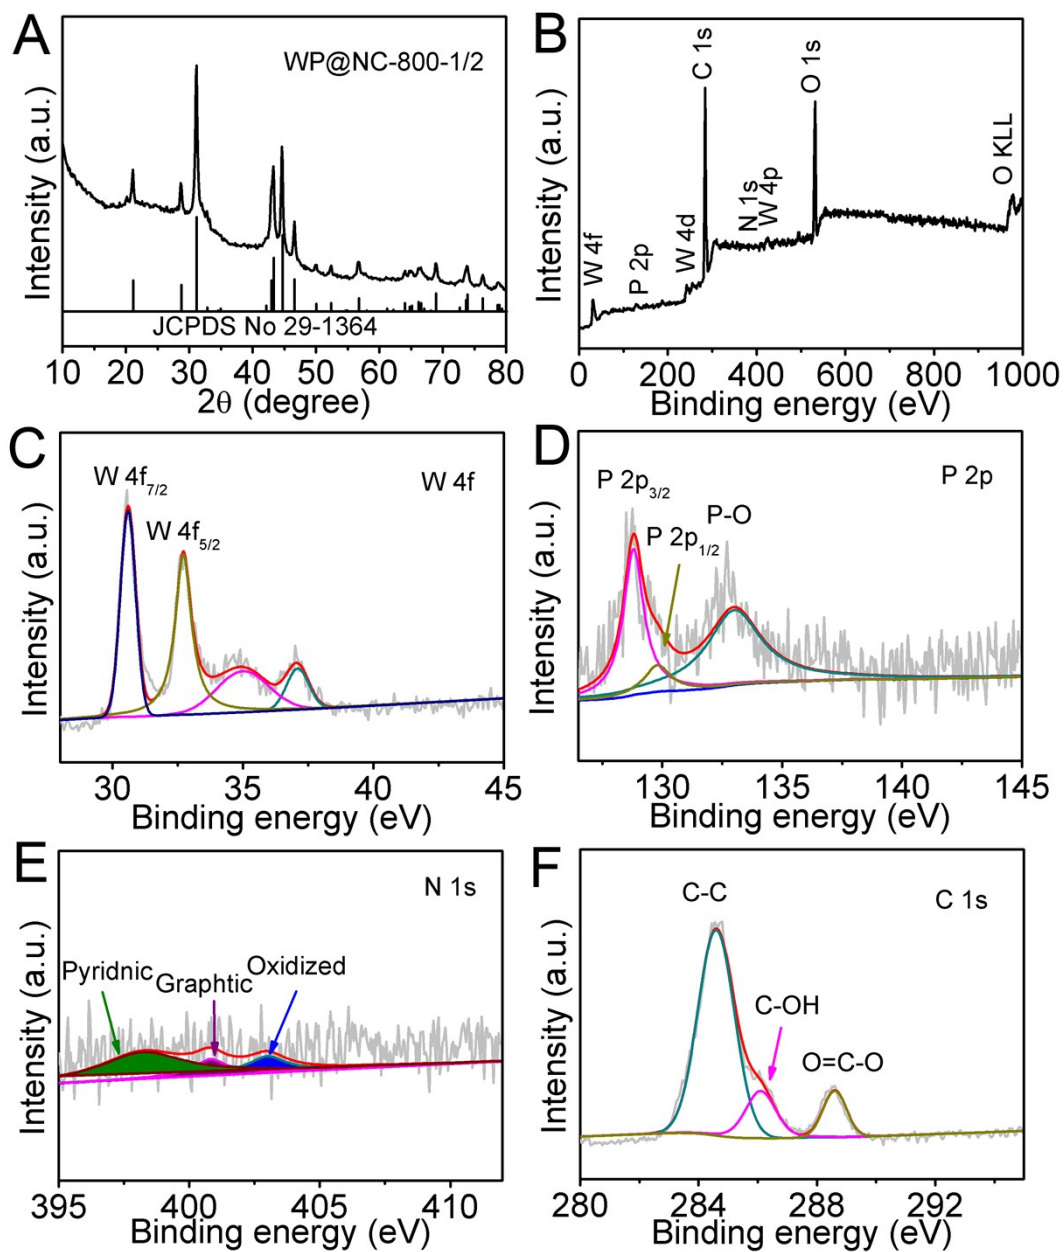

**Fig. S7.** (A) XRD pattern of C-800-2. (B) The survey XPS spectra of the C-800-2. (C-F) The high-resolution XPS spectra of the C-800-2.

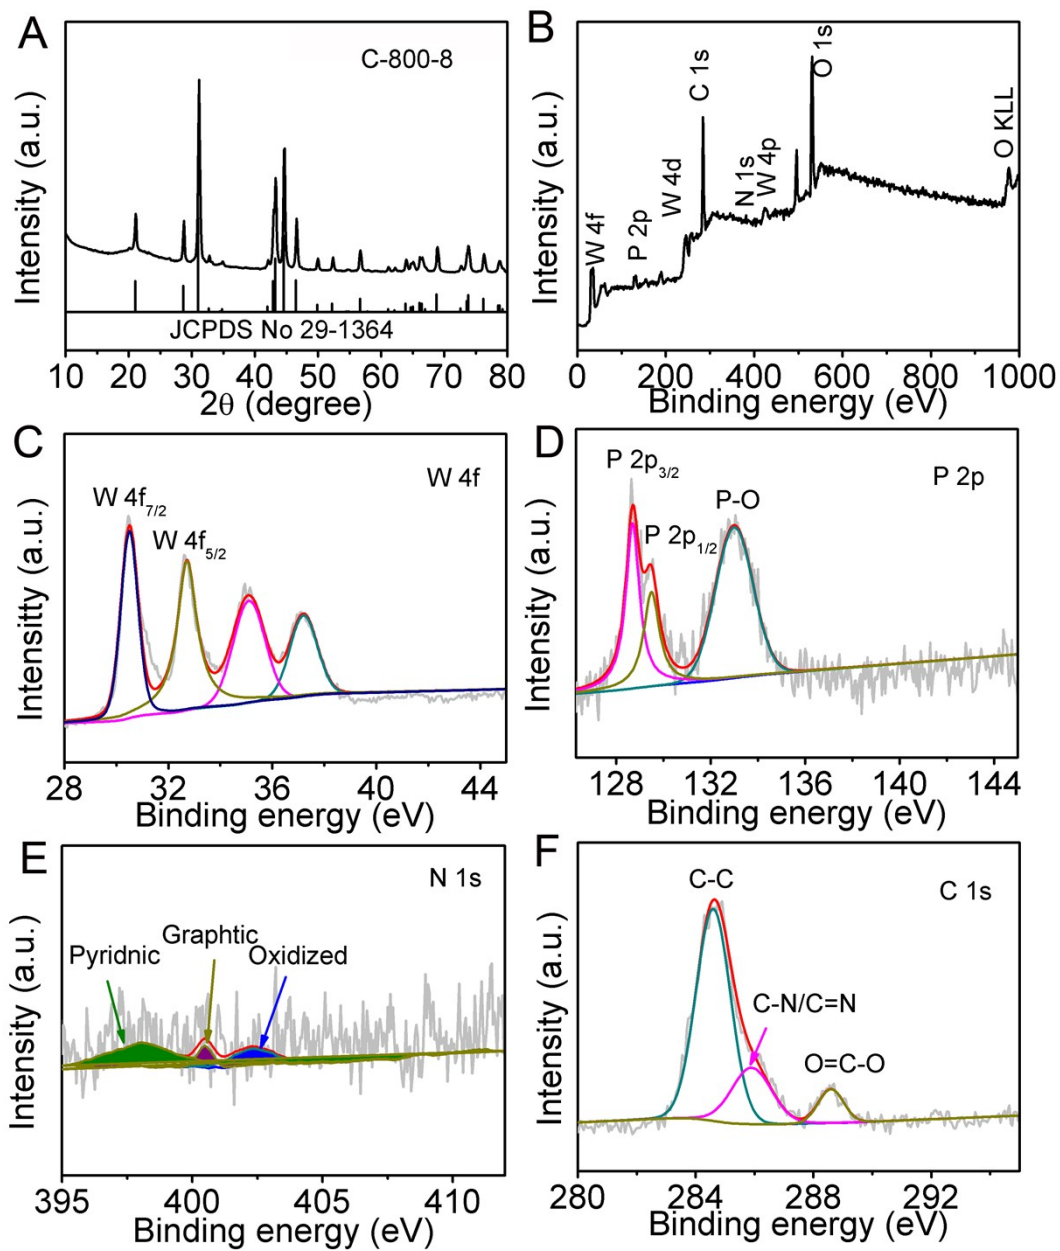

**Fig. S8.** (A) XRD pattern of C-800-8. (B) The survey XPS spectra of the C-800-8. (C-F) The high-resolution XPS spectra of the C-800-8.



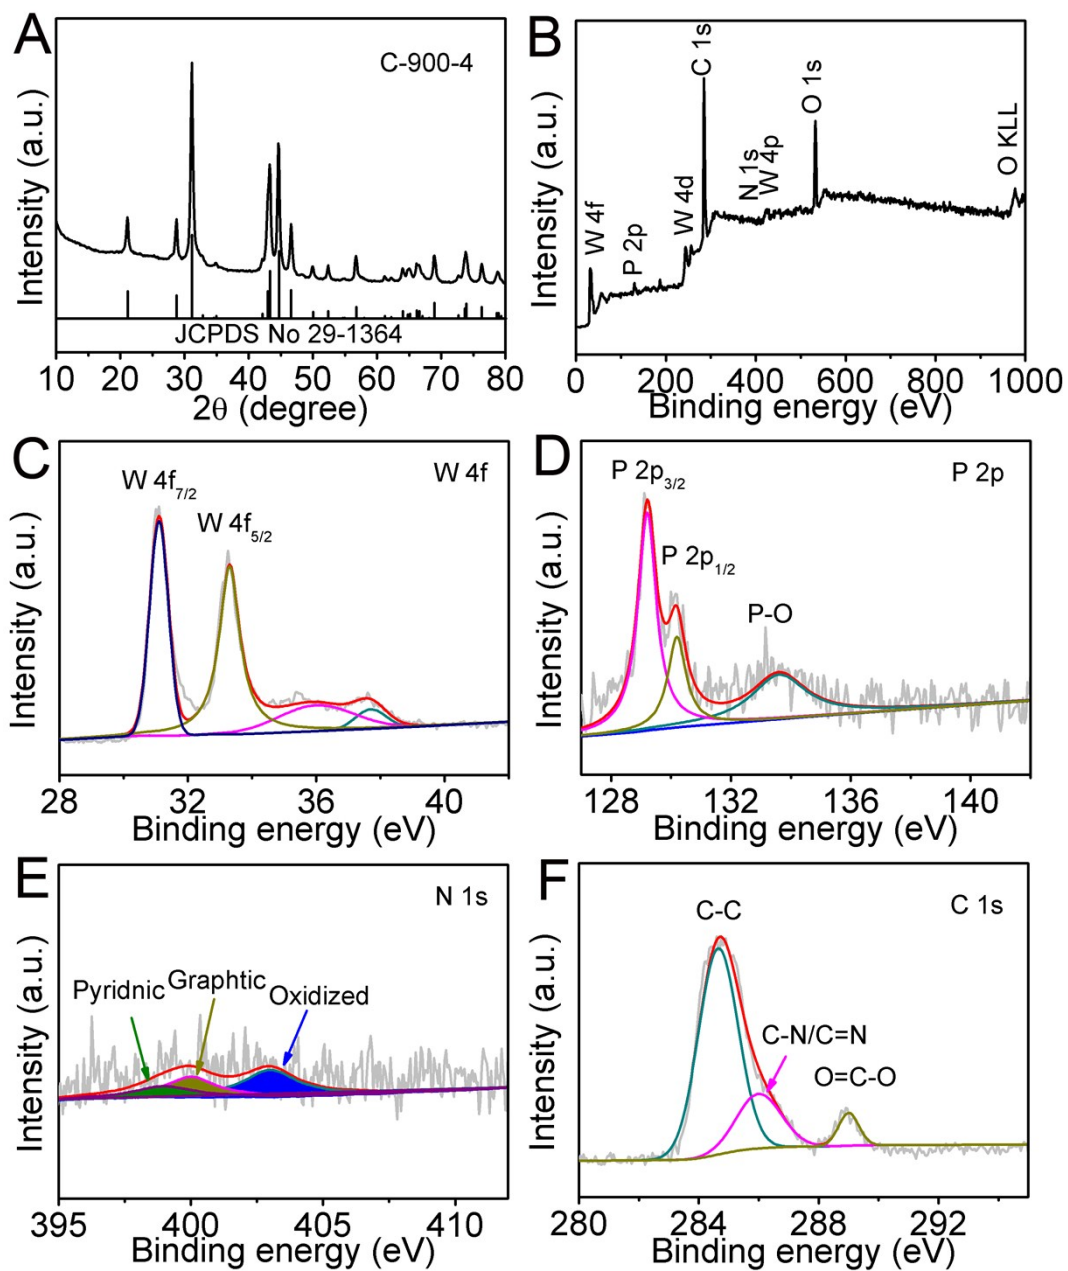

**Fig. S9.** (A) XRD pattern of C-900-4. (B) The survey XPS spectra of the C-900-4. (C-F) The high-resolution XPS spectra of the C-900-4.

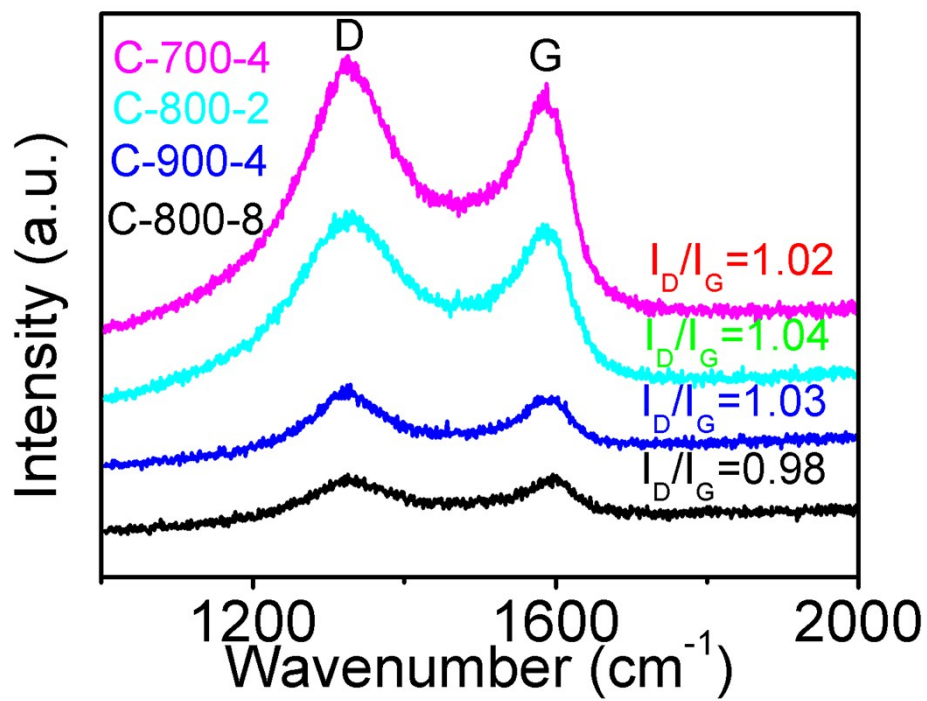

Fig. S10. Raman spectra for the C-700-4, C-800-2, C-900-4 and C-800-8.

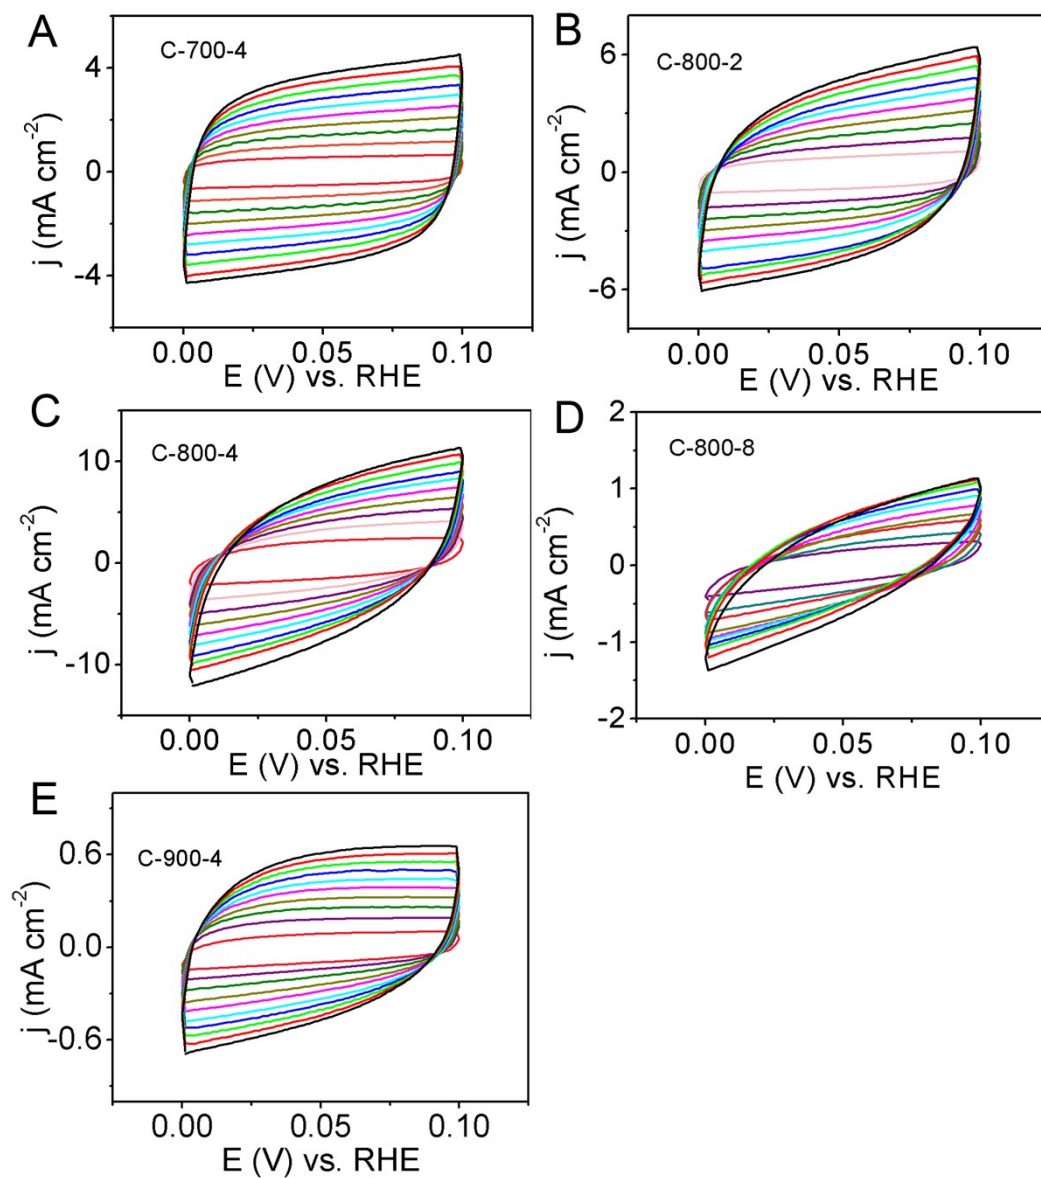

**Fig. S11.** CVs for (A) C-700-4, (B) C-800-2, (C) C-800-4, (D) C-800-8 and (E) C-900-4.

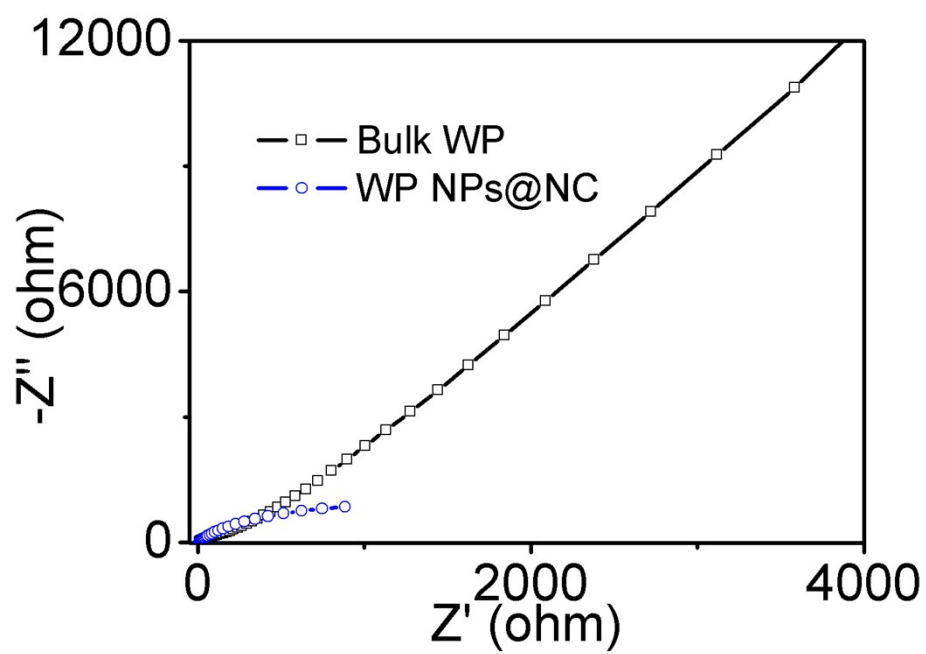

Fig. S12. EIS data for WP NPs@NC and bulk WP

**Table S1.** Comparison of HER performance in acidic media for WP NPs@NC with tungsten phosphide-based HER electrocatalyst.

| Catalyst                          | Electrolyte                          | Onset overpotential (mV) | Current density ( $j$ , mA cm <sup>-2</sup> ) | $\eta$ at the corresponding $j$ (mV) | Exchange current density (mA cm <sup>-2</sup> ) | Ref.      |
|-----------------------------------|--------------------------------------|--------------------------|-----------------------------------------------|--------------------------------------|-------------------------------------------------|-----------|
| WP NPs@NC                         | 0.5 M H <sub>2</sub> SO <sub>4</sub> | 40                       | 10                                            | 102                                  | 0.25                                            | This work |
| amorphous WP nanoparticles        | 0.5 M H <sub>2</sub> SO <sub>4</sub> | -                        | 10                                            | 120                                  | -                                               | 1         |
| WP <sub>2</sub> submicroparticles | 0.5 M H <sub>2</sub> SO <sub>4</sub> | 54                       | 10                                            | 161                                  | 0.017                                           | 2         |
| WP <sub>2</sub> nanorods          | 0.5 M H <sub>2</sub> SO <sub>4</sub> | 56                       | 10                                            | 148                                  | 0.013                                           | 3         |
| WP NAs/CC                         | 0.5 M H <sub>2</sub> SO <sub>4</sub> | 50                       | 10                                            | 130                                  | 0.29                                            | 4         |

**Table S2.** Comparison of HER performance in acidic media for WP NPs@NC with other non-noble-metals HER electrocatalyst.

| Catalyst                                            | Electrolyte                          | Onset overpotential (mV) | Current density ( $j$ , mA cm <sup>-2</sup> ) | $\eta$ at the corresponding $j$ (mV) | Exchange current density (mA cm <sup>-2</sup> ) | Ref.      |
|-----------------------------------------------------|--------------------------------------|--------------------------|-----------------------------------------------|--------------------------------------|-------------------------------------------------|-----------|
| WP NPs@NC                                           | 0.5 M H <sub>2</sub> SO <sub>4</sub> | 40                       | 10                                            | 102                                  | 0.25                                            | This work |
| Ni <sub>2</sub> P hollow nanoparticles              | 0.5 M H <sub>2</sub> SO <sub>4</sub> | -                        | 10                                            | 116                                  | 0.033                                           | 5         |
| Ni <sub>2</sub> P nanoparticles                     | 1.0 M H <sub>2</sub> SO <sub>4</sub> | 46                       | 20                                            | 140                                  | -                                               | 6         |
| FeP nanosheets                                      | 0.5 M H <sub>2</sub> SO <sub>4</sub> | 100                      | 10                                            | ~240                                 | -                                               | 7         |
| CoP/CNT interconnected network of MoP nanoparticles | 0.5 M H <sub>2</sub> SO <sub>4</sub> | 54                       | 10                                            | 122                                  | 0.288                                           | 8         |
| bulk MoP                                            | 0.5 M H <sub>2</sub> SO <sub>4</sub> | 40                       | 10                                            | 125                                  | 0.086                                           | 9         |
| exfoliated WS <sub>2</sub> nanosheets               | 0.5 M H <sub>2</sub> SO <sub>4</sub> | 50                       | 30                                            | 180                                  | 0.034                                           | 10        |
| WS <sub>2</sub> /graphene                           | 0.5 M H <sub>2</sub> SO <sub>4</sub> | 80-100                   | 10                                            | ~220                                 | 0.02                                            | 11        |
| WS <sub>2</sub> nanoribbons                         | 0.5 M H <sub>2</sub> SO <sub>4</sub> | 150-200                  | 10                                            | ~270                                 | -                                               | 12        |
| WS <sub>2</sub> nanoflakes                          | 0.5 M H <sub>2</sub> SO <sub>4</sub> | -                        | 10                                            | ~225                                 | -                                               | 13        |
| WS <sub>2</sub> nanosheets                          | 0.5 M H <sub>2</sub> SO <sub>4</sub> | 100                      | 10                                            | ~130                                 | -                                               | 14        |
| W <sub>2</sub> N nanorods                           | 0.5 M H <sub>2</sub> SO <sub>4</sub> | 75                       | 10                                            | ~140                                 | -                                               | 15        |
| WO <sub>2</sub>                                     | 0.5 M H <sub>2</sub> SO <sub>4</sub> | -                        | 10                                            | 500                                  | -                                               | 16        |
| WO <sub>2.9</sub>                                   | 0.5 M H <sub>2</sub> SO <sub>4</sub> | -                        | 10                                            | 58                                   | 0.64                                            | 17        |
| nanoporous Mo <sub>2</sub> C nanowires              | 0.5 M H <sub>2</sub> SO <sub>4</sub> | -                        | 10                                            | 70                                   | 0.4                                             | 18        |
| NiMoN <sub>x</sub> /C                               | 0.5 M H <sub>2</sub> SO <sub>4</sub> | 70                       | 60                                            | 200                                  | -                                               | 19        |
| Co <sub>0.6</sub> Mo <sub>1.4</sub> N <sub>2</sub>  | 0.1 M HClO <sub>4</sub>              | 78                       | 5                                             | 220                                  | 0.24                                            | 20        |
| Co-NRCNTs                                           | 0.1 M HClO <sub>4</sub>              | -                        | 10                                            | 200                                  | 0.23                                            | 21        |
| CoSe <sub>2</sub> nanobelts                         | 0.5 M H <sub>2</sub> SO <sub>4</sub> | 50                       | 10                                            | 260                                  | 0.01                                            | 22        |
|                                                     | 0.5 M H <sub>2</sub> SO <sub>4</sub> | 50                       | 10                                            | ~125                                 | 8.4×10 <sup>-3</sup>                            | 23        |

**Table S3.** Comparison of HER performance in neutral media for WP NPs@NC with other non-precious metal HER electrocatalyst.

| Catalyst                             | Electrolyte/pH | Current density<br>( $j$ , mA cm <sup>-2</sup> ) | Overpotential at the<br>corresponding $j$ (mV) | Ref.         |
|--------------------------------------|----------------|--------------------------------------------------|------------------------------------------------|--------------|
| WP NPs@NC                            | 1.0 M PBS      | 2<br>10                                          | 118<br>196                                     | This<br>work |
| WP <sub>2</sub><br>submicroparticles | 1.0 M PBS      | 2                                                | 143                                            | 2            |
| WP <sub>2</sub> nanorods             | 1.0 M PBS      | 2                                                | 172                                            | 3            |
| WP NAs/CC                            | 1.0 M PBS      | 2                                                | 95                                             | 4            |
| Co-NRCNTs                            | 0.1 M PBS      | 2                                                | 380                                            | 22           |
| FeP/Ti                               | 1.0 M PBS      | 10                                               | 102                                            | 24           |
| bulk Mo <sub>2</sub> C               | pH=7           | 1                                                | 200                                            | 25           |
| bulk Mo <sub>2</sub> B               | pH=7           | 1                                                | 250                                            | 25           |
| H <sub>2</sub> -CoCat/FTO            | 0.5 M KPi      | 2                                                | 385                                            | 26           |
| Co-S/FTO                             | 1.0 M PBS      | 2                                                | 83                                             | 27           |
| CuMoS <sub>4</sub> crystals          | pH=7           | 2                                                | 210                                            | 28           |

**Table S4.** Comparison of HER performance in basic media for WP NPs@NC with other non-precious metal HER electrocatalyst.

| Catalyst                             | Electrolyte | Current density<br>( $j$ , mA cm <sup>-2</sup> ) | Overpotential at the<br>corresponding $j$ (mV) | Ref.      |
|--------------------------------------|-------------|--------------------------------------------------|------------------------------------------------|-----------|
| WP NPs@NC                            | 1.0 M KOH   | 2<br>10                                          | 92<br>150                                      | This work |
| WP <sub>2</sub><br>submicroparticles | 1.0 M KOH   | 10                                               | 153                                            | 2         |
| WP <sub>2</sub> nanorods             | 1.0 M KOH   | 2                                                | 149                                            | 3         |
| WP NAs/CC                            | 1.0 M KOH   | 10                                               | 150                                            | 4         |
| Ni <sub>2</sub> P nanoparticles      | 1.0 M KOH   | 20                                               | 250                                            | 6         |
| Co-NRCNTs                            | 1.0 M KOH   | 10                                               | 370                                            | 22        |
| bulk Mo <sub>2</sub> B               | 1.0 M KOH   | 1                                                | 250                                            | 25        |
| Ni                                   | 1.0 M KOH   | 10                                               | 400                                            | 25        |
| Co-S/FTO                             | 1.0 M KOH   | 1                                                | 480                                            | 27        |
| Ni wire                              | 1.0 M NaOH  | 10                                               | 350                                            | 29        |
| Ni-Mo alloy/Ti foil                  | 1.0 M NaOH  | 10                                               | 80                                             | 29        |



## References

- 1 J. M. McEnaney, J. C. Crompton, J. F. Callejasa, E. J. Popczuna, C. G. Read, N. S. Lewis and R. E. Schaak, *Chem. Commun.*, 2014, **50**, 11026-11028.
- 2 Z. Xing, Q. Liu, A. M. Asiri and X. Sun, *ACS Catal.*, 2015, **5**, 145-149.
- 3 H. Du, S. Gu, R. Liu and C. Li, *J. Power. Sources*, 2015, **278**, 540-545.
- 4 Z. Pu, Q. Liu, A. M. Asiri and X. Sun, *ACS Appl. Mater. Interfaces*, 2014, **6**, 21874-21879.
- 5 E. J. Popczun, J. R. McKone, C. G. Read, A. J. Biacchi, A. M. Wiltrout, N. S. Lewis and R. E. Schaak, *J. Am. Chem. Soc.*, 2013, **135**, 9267-9270.
- 6 L. Feng, H. Vrubel, M. Bensimon and X. Hu, *Phys. Chem. Chem. Phys.*, 2014, **16**, 5917-5921.
- 7 Y. Xu, R. Wu, J. Zhang, Y. Shi and B. Zhang, *Chem. Commun.*, 2013, **49**, 6656-6658.
- 8 Q. Liu, J. Tian, W. Cui, P. Jaing, N. Cheng, A. M. Asiri and X. Sun, *Angew. Chem. Int. Ed.*, 2014, **126**, 6828-6832.
- 9 Z. Xing, Q. Liu, A. M. Asiri and X. Sun, *Adv. Mater.*, 2014, **26**, 5702-5707.
- 10 P. Xiao, M. A. Sk, L. Thia, X. Ge, R. J. Lim, J. Wang, K. H. Lim and X. Wang, *Energy Environ. Sci.*, 2014, **7**, 2624-2629.
- 11 D. Voiry, H. Yamaguchi, J. Li, R. Silva, D. Alves, T. Fujita, M. Chen, T. Asefa, V. B. Shenoy, G. Eda and M. Chhowalla, *Nat. Mater.*, 2013, **12**, 850-855.
- 12 J. Yang, D. Voiry, S. J. Ahn, D. Kang, A. Y. Kim, M. Chhowalla and S. H. Shin, *Angew. Chem. Int. Ed.*, 2013, **52**, 13751-13754.
- 13 J. Lin, Z. Peng, G. Wang, D. Zakhidov, E. Larios, M. J. Yacaman and J. M. Tour, *Adv. Energy Mater.*, 2014, **4**, 1301875.
- 14 L. Cheng, W. Huang, Q. Gong, C. Liu, Z. Liu, Y. Li and H. Dai, *Angew. Chem. Int. Ed.*, 2014, **53**, 7860-7863.
- 15 M. A. Lukowski, A. S. Daniel, C. R. English, F. Meng, A. Forticaux, R. Hamers and S. Jin, *Energy Environ. Sci.*, 2014, **7**, 2608-2613.
- 16 V. Chakrapani, J. Thangala and M. K. Sunkara, *Int. J. Hydrogen Energy*, 2009,

- 34**, 9050-9059.
- 17 R. Wu, J. Zhang, Y. Shi, D. Liu and B. Zhang, *J. Am. Chem. Soc.*, 2015, **137**, 6983-6986.
  - 18 Y. Li, P. Liu, L. Pan, H. Wang, Z. Yang, L. Zheng, P. Hu, H. Zhao, G. Liu and H. Yang, *Nat. Commun.*, 2015, **6**, 8064.
  - 19 L. Liao, S. Wang, J. Xiao, X. Bian, Y. Zhang, M. Scanlon, X. Hu, Y. Tang, B. Liu and H. Giraultb, *Energy Environ. Sci.*, 2014, **7**, 387-392.
  - 20 W. Chen, K. Sasaki, C. Ma, A. I. Frenkel, N. Marinkovic, J. T. Muckerman, Y. Zhu and R. R. Adzic, *Angew. Chem. Int. Ed.*, 2012, **51**, 6131-6135.
  - 21 B. Cao, G. M. Veith, J. C. Neuefeind, R. R. Adzic and P. G. Khalifah, *J. Am. Chem. Soc.*, 2013, **135**, 19186-19192.
  - 22 X. Zou, X. Huang, A. Goswami, R. Silva, B. R. Sathe, E. Mikmekova and T. Asefa, *Angew. Chem. Int. Ed.*, 2014, **126**, 4461-4465.
  - 23 Y. Xu, M. Gao, Y. Zheng, J. Jiang and S. Yu, *Angew. Chem. Int. Ed.*, 2013, **52**, 8546-8550.
  - 24 J. F. Callejas, J. M. McEnaney, C. G. Read, J. C. Crompton, A. J. Biacchi, E. J. Popczun, T. R. Gordon, N. S. Lewis and R. E. Schaak, *ACS Nano*, 2014, **8**, 11101-11107.
  - 25 H. Vrubel and X. Hu, *Angew. Chem. Int. Ed.*, 2012, **124**, 12875-12878.
  - 26 S. Cobo, J. Heidkamp, P. A. Jacques, J. Fize, V. Fourmond, L. Guetaz, B. Jousseme, V. Ivanova, H. Dau, S. Palacin, M. Fontecave and V. Artero, *Nat. Mater.*, 2012, **11**, 802-807.
  - 27 Y. Sun, L. Chong, D. Grauer, J. Yano, J. Long, P. Yang and C. Chang, *J. Am. Chem. Soc.*, 2013, **135**, 17699-17702.
  - 28 P. Tran, M. Nguyen, S. Pramana, A. Bhattacharjee, S. Chiam, J. Fize, M. Field, V. Artero, L. Wong, J. Loo and J. Barber, *Energy Environ. Sci.*, 2012, **5**, 8912-8916.
  - 29 J. McKone, B. Sadtler, C. Werlang, N. S. Lewis and H. Gray, *ACS Catal.*, 2013, **3**, 166-169.
